# Supplementary material for: Oncolytic vaccinia virus induces a novel phenotype of CD8+ effector T cells characterized by high ICOS expression
Source: PubMed Central journal article supplement — Mol Ther Oncolytics. 2021 Feb 4;20:422–32. doi: 10.1016/j.omto.2021.01.016 (PMC7900640; doi:10.1016/j.omto.2021.01.016), 2021-02-04
Supplement: mmc1.pdf [file mmc1.pdf]

**OMTO, Volume 20**

**Supplemental Information**

**Oncolytic vaccinia virus induces a novel  
phenotype of CD8<sup>+</sup> effector T cells  
characterized by high ICOS expression**

**Midori Yamashita, Mamoru Tasaki, Ryuji Murakami, Yukinori Arai, Takafumi Nakamura, and Shinsuke Nakao**

**Supplementary Figure S1. Human IL-7 and murine IL-12 secreted by hIL-7/mIL-12-VV-infected cells stimulate murine immune cells.**

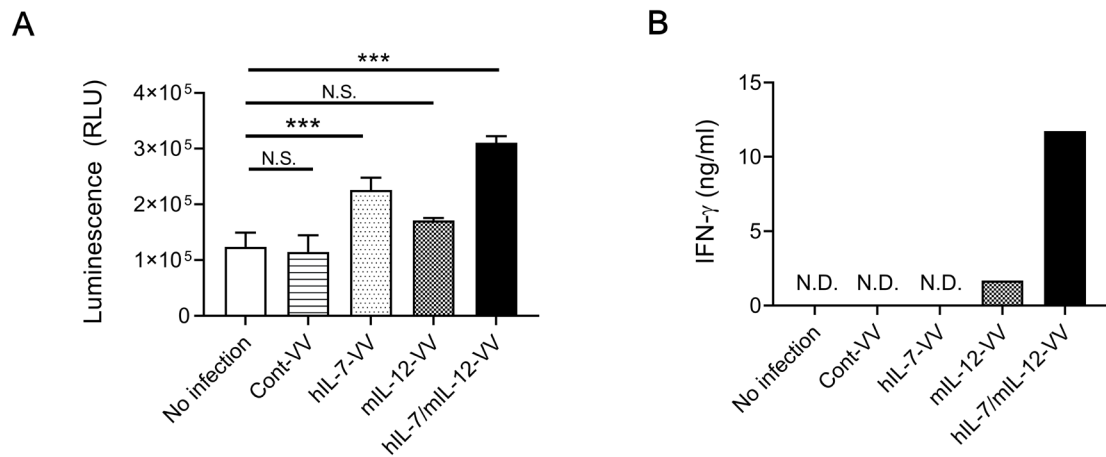

(A) Culture supernatants of A549 cells infected with recombinant viruses at a multiplicity of infection (MOI) = 1.0 were collected and used to stimulate murine splenocytes for three days. Luminescence measured using the CellTiter-Glo Assay which is proportional to the number of splenocytes. Data are mean  $\pm$  SEM. RLU, relative luminescence unit. (B) Secretion of murine IFN- $\gamma$  from splenocytes as in (A). N.D., not detected. \*\*\*P < 0.001 by Dunnet's multiple comparisons test. N.S., not significant.

**Supplementary Figure S2. Depletion of CD8<sup>+</sup> T cells suppresses antitumor efficacy of hIL-7/mIL-12-VV.**

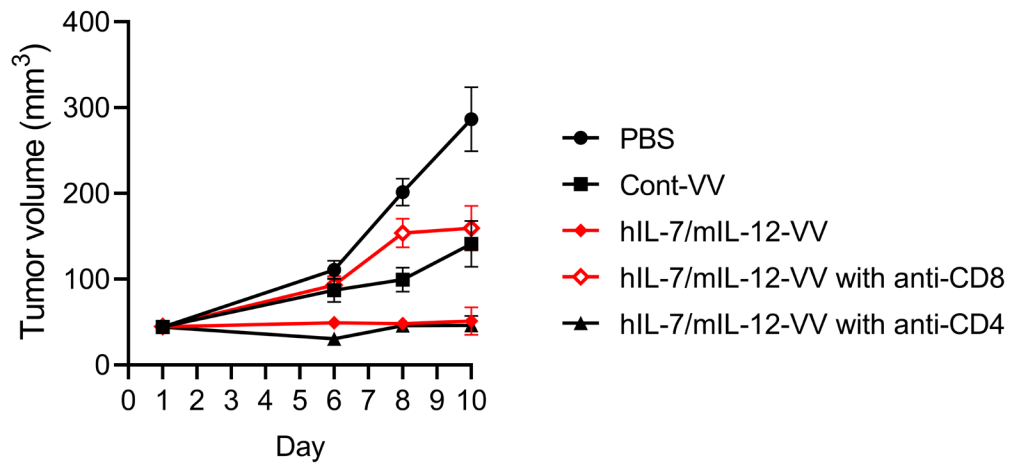

CT26.WT tumors were intratumorally treated with Cont-VV or hIL-7/mIL-12-VV with or without depletion of CD8<sup>+</sup> T cells or CD4<sup>+</sup> T cells. Tumor growth is shown. n = 6 per group. Mean ± SEM is shown.

**Supplementary Figure S3. Intratumoral treatment with hIL-7/mIL-12-VV, but not Cont-VV, induces PD-L1 expression in CT26.WT tumors.**

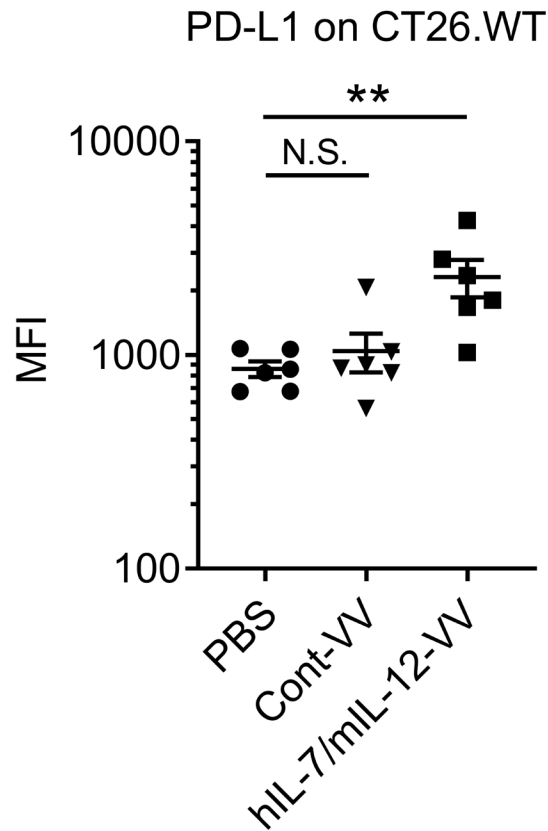

CT26.WT-bearing mice were intratumorally treated with Cont-VV or hIL-7/mIL-12-VV. Seven days after treatment, tumors were collected, and expression of PD-L1 in CT26.WT cells were assessed by flow cytometry (n = 6). Mean  $\pm$  SEM is shown.  $**P < 0.01$  by Mann-Whitney *U* test.

N.S., not significant.

**Supplementary Figure S4. Representative plots of PD-1, GTR, TIGIT and Tim-3 expression in intratumoral CD8<sup>+</sup> T cells.**

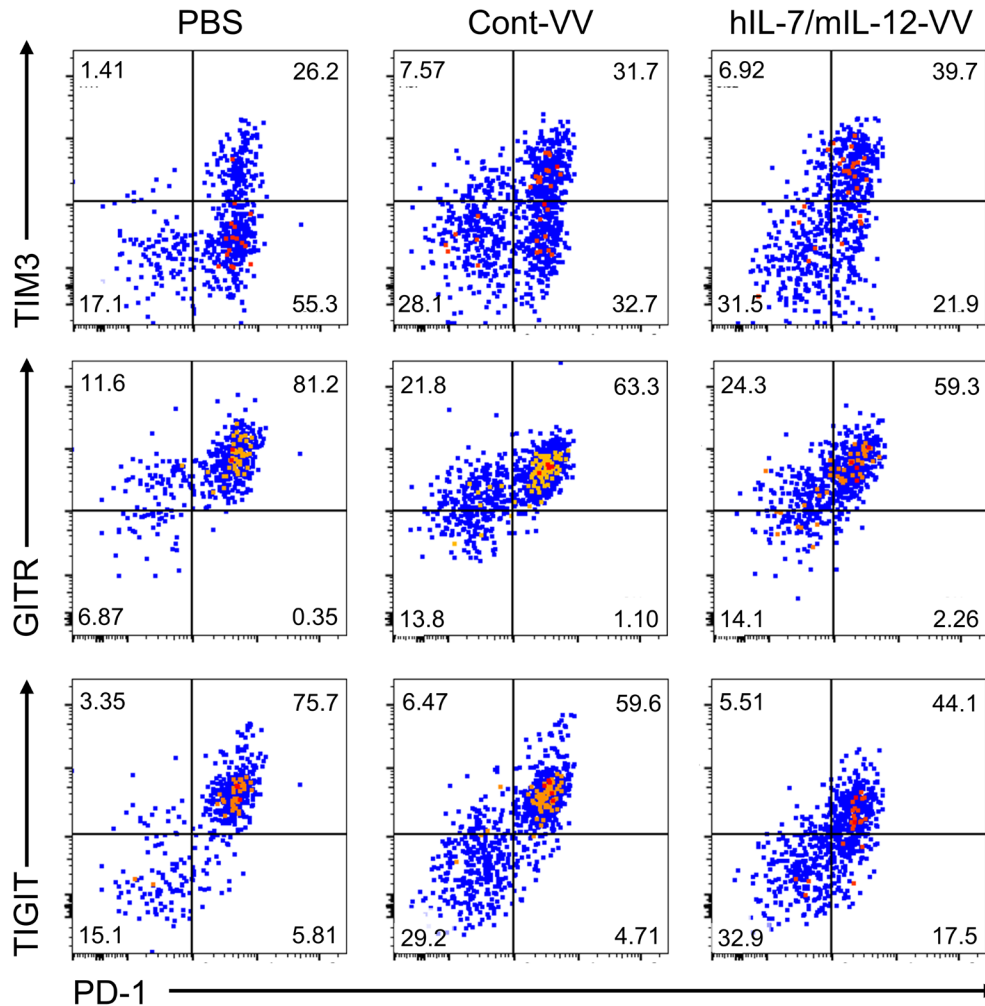

Mice bearing CT26.WT tumors were intratumorally treated with PBS,  $2 \times 10^7$  pfu of Cont-VV or  $2 \times 10^7$  pfu of hIL-7/mIL-12-VV. Six days after treatment, tumor-infiltrating CD8<sup>+</sup> T cells were analyzed by flow cytometry as described in Fig. 2.

**Supplementary Figure S5. ICOS<sup>+</sup>PD-1<sup>-</sup>CD8<sup>+</sup> T cells induced by hIL-7/mIL-12-VV show granzyme B expression.**

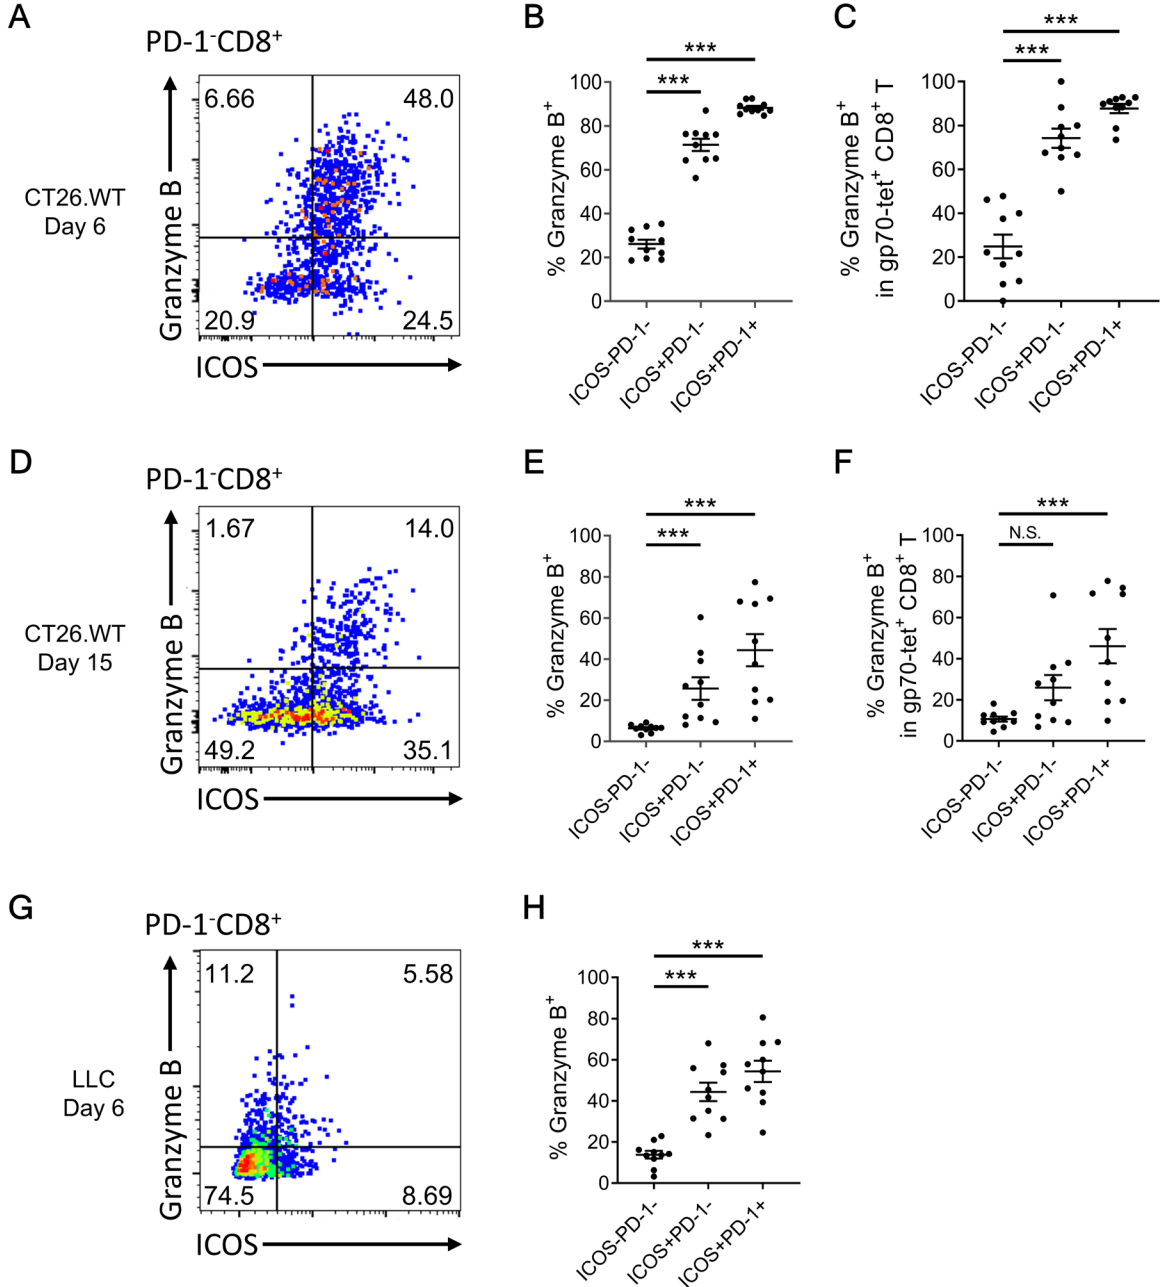

(A-F) CT26.WT-bearing BALB/c mice were intratumorally treated with hIL-7/mIL-12-VV as described in Fig. 2, and tumors were collected six (A-C) or fifteen (D-F) days after treatment (n =

10 per group). (A and D) Representative plots of granzyme B and ICOS expression in intratumoral PD-1<sup>-</sup>CD8<sup>+</sup> T cells. (B and E) Expression of granzyme B in intratumoral ICOS<sup>-</sup>PD-1<sup>-</sup>CD8<sup>+</sup> T cells, ICOS<sup>+</sup>PD-1<sup>-</sup>CD8<sup>+</sup> T cells and ICOS<sup>+</sup>PD-1<sup>+</sup>CD8<sup>+</sup> T cells. (C and F) Expression of granzyme B in gp70-tetramer<sup>+</sup> tumor antigen-specific CD8<sup>+</sup> T cells. (G and H) LLC tumors treated with Cont-VV were collected six days after treatment, and tumor-infiltrating CD8<sup>+</sup> T cells were analyzed (n = 10). (G) Representative plots of granzyme B and ICOS expression in intratumoral PD-1<sup>-</sup>CD8<sup>+</sup> T cells. (H) Expression of granzyme B in each indicated subset. Mean ± SEM is shown. \*\*\**P* < 0.001 by Mann-Whitney *U* test. N.S., not significant.
